# Supplementary material for: Prevalence and Patterns of Resuscitation‐Associated Injury Detected by Head‐to‐Pelvis Computed Tomography After Successful Out‐of‐Hospital Cardiac Arrest Resuscitation
Source: PubMed Central journal article supplement — J Am Heart Assoc. 2022 Feb 19;11(3):e023949. doi: 10.1161/JAHA.121.023949 (PMC9238478; doi:10.1161/jaha.121.023949), 2022-02-19
Supplement: JAH3-11-e023949-s001.pdf [file JAH3-11-e023949-s001.pdf]

# **SUPPLEMENTAL MATERIAL**

## Data S1.

### Supplemental Methods

**Rib-cage injury definitions:** Fractures were characterized as “segmental” when  $\geq 2$  fractures were identified on the same rib; and “displaced” when there was one full shaft-width displacement. For angle measurements, an anteroposterior line was drawn traversing from the midline sternum to the posterior rib line (a line tangential to the posterior margin of the ribcage). Angles were measured from the midpoint of the anteroposterior line to the fracture, such as to create three sectors on the sagittal plane: 0 - 72° (anterolateral), 72 - 108° (lateral), and 108 - 180° (posterolateral). For segmental fractures, only the location of the anterior-most fracture was recorded as that would be more relevant for determination of possible early surgical intervention. Surgical consultation for consideration of early stabilization was suggested for fractures satisfying any of the following radiographic criteria: 3  $\geq$  displaced, 3  $\geq$  contiguous segmental (“radiographic flail chest”), or 3  $\geq$  continuous bilateral anterior or costochondral (“radiographic flail sternal segment”) rib fractures, or for displaced sternal fractures.

**Table S1. Distribution of resuscitation-associated injuries according to survival to discharge.**

| Type of resuscitation-associated injury       | Survival to discharge |              |       |
|-----------------------------------------------|-----------------------|--------------|-------|
|                                               | Yes<br>(n=44)         | No<br>(n=60) | p     |
| Any post-resuscitation injury                 | 33/44 (75%)           | 51/60 (85%)  | 0.218 |
| Time-critical*                                | 5/44 (11%)            | 10/60 (17%)  | 0.576 |
| Liver/spleen laceration                       | 3 (7%)                | 3 (5%)       | 0.696 |
| Pneumothorax                                  | 3 (7%)                | 2 (3%)       | 0.648 |
| Mediastinal hemorrhage, active extravasation  | 0 (0%)                | 1 (2%)       | 1.000 |
| Hemopericardium                               | 0 (0%)                | 1 (2%)       | 1.000 |
| Pulmonary laceration                          | 1 (2%)                | 2 (3%)       | 1.000 |
| Vascular access hemorrhage                    | 0 (0%)                | 1 (2%)       | 1.000 |
| Mainstem bronchus intubation                  | 0 (0%)                | 2 (3%)       | 0.507 |
| Not time-critical*                            | 32/44 (73%)           | 48/60 (80%)  | 0.481 |
| Mediastinal hematoma w/o active extravasation | 2 (5%)                | 7 (12%)      | 0.296 |
| Pulmonary contusion                           | 6 (14%)               | 8 (13%)      | 1.000 |
| Rib fractures                                 | 30 (68%)              | 47 (78%)     | 0.265 |

|                                                 |           |           |              |
|-------------------------------------------------|-----------|-----------|--------------|
| Displaced                                       | 6 (14%)   | 10 (17%)  | 0.787        |
| Meets surgical stabilization screening criteria | 17 (39%)  | 28 (47%)  | 0.431        |
| 3 ≥ displaced rib fractures                     | 0 (0%)    | 3 (5%)    | 0.261        |
| Flail chest                                     | 0 (0%)    | 1 (2%)    | 1.000        |
| Flail sternal segment                           | 15 (34%)  | 27 (45%)  | 0.314        |
| Mean number of rib fractures per patient        | 4.0 ± 4.4 | 5.7 ± 4.7 | <b>0.034</b> |
| Sternal Fracture                                | 4 (9%)    | 15 (25%)  | <b>0.043</b> |
| Displaced                                       | 2 (5%)    | 4 (7%)    | 1.000        |

\*Data are expressed as n and % of patients with each injury type; some patients had more than one injury.

**Table S2. Distribution of resuscitation-associated injuries according to utilization of mechanical CPR.**

| Type of resuscitation-associated injury       | Mechanical CPR |              |       |
|-----------------------------------------------|----------------|--------------|-------|
|                                               | Yes<br>(n=28)  | No<br>(n=76) | p     |
| Any post-resuscitation injury                 | 25/28 (89%)    | 59/76 (78%)  | 0.263 |
| Time-critical*                                | 6/28 (21%)     | 9/76 (12%)   | 0.224 |
| Liver/spleen laceration                       | 3 (11%)        | 3 (4%)       | 0.340 |
| Pneumothorax                                  | 2 (7%)         | 3 (4%)       | 0.609 |
| Mediastinal hemorrhage, active extravasation  | 0 (0%)         | 1 (1%)       | 1.000 |
| Hemopericardium                               | 1 (4%)         | 0 (0%)       | 0.269 |
| Pulmonary laceration                          | 1 (4%)         | 2 (3%)       | 1.000 |
| Vascular access hemorrhage                    | 0 (0%)         | 1 (1%)       | 1.000 |
| Mainstem bronchus intubation                  | 1 (4%)         | 1 (1%)       | 0.468 |
| Not time-critical*                            | 24/28 (86%)    | 56/76 (74%)  | 0.294 |
| Mediastinal hematoma w/o active extravasation | 5 (18%)        | 4 (5%)       | 0.057 |
| Pulmonary contusion                           | 6 (21%)        | 8 (11%)      | 0.195 |
| Rib fractures                                 | 23 (82%)       | 54 (71%)     | 0.319 |

|                                                 |           |           |              |
|-------------------------------------------------|-----------|-----------|--------------|
| Displaced                                       | 6 (21%)   | 10 (13%)  | 0.360        |
| Meets surgical stabilization screening criteria | 12 (43%)  | 33 (43%)  | 1.000        |
| 3 ≥ displaced rib fractures                     | 0 (0%)    | 3 (4%)    | 0.562        |
| Flail chest                                     | 0 (0%)    | 1 (1%)    | 1.000        |
| Flail sternal segment                           | 9 (32%)   | 33 (43%)  | 0.370        |
| Mean number of rib fractures per patient        | 5.4 ± 4.0 | 4.9 ± 4.8 | 0.595        |
| Sternal Fracture                                | 10 (36%)  | 9 (12%)   | <b>0.009</b> |
| Displaced                                       | 5 (18%)   | 1 (1%)    | <b>0.005</b> |

\*Data are expressed as n and % of patients with each injury type; some patients had more than one injury.
